# Supplementary material for: Halide-modulated bistate and tristate fluorescence switching for Cu(i) and Ag(i) complexes
Source: Royal Society of Chemistry journal article supplement (doi:10.1039/c4nj01639d), 2014-11-27
Supplement: c4nj01639d1.pdf [file c4nj01639d1.pdf]

## *Supporting Information*

### **Halide-modulated bistate and tristate fluorescence switching for Cu(I) and Ag(I) complexes**

*Chang-Chuan Chou\*, Hsueh-Ju Liu, Lucas Hung-Chieh Chao and Chia-Chi Yang*

#### **Contents**

1.  $^1\text{H}$  spectrum of  $\text{L}^{\text{ph}}$  (Figure S1)
2.  $^1\text{H}$  spectrum of complex  $\mathbf{1}\cdot\text{ClO}_4$  (Fig. S2)
3.  $^1\text{H}$  &  $^{13}\text{C}$  NMR spectra of  $\mathbf{3}$  (Fig. S3)
4.  $^1\text{H}$  &  $^{13}\text{C}$  NMR spectra of  $\mathbf{4}\cdot\text{CuCl}_2$  (Fig. S4)
5.  $^1\text{H}$  &  $^{13}\text{C}$  NMR spectra of  $\mathbf{5}\cdot\text{ClO}_4$  (Fig. S5)
6.  $^1\text{H}$  NMR spectra of the reaction of  $\mathbf{1}\cdot\text{ClO}_4$  with  $n\text{-Bu}_4\text{NBr}$  (Fig. S6)
7.  $^1\text{H}$  NMR spectra of the reaction of  $\mathbf{3}$  with  $n\text{-Bu}_4\text{NF}$  (Fig. S7)
8. ORTEP view of the cocrystals  $\{\mathbf{1}\cdot\text{ClO}_4 + \mathbf{4}\cdot\text{CuCl}_2\}$  (Fig. S8)
9. The spectral change of fluorescence spectra upon an addition of  $n\text{-Bu}_4\text{NBr}$  to complexes  $\mathbf{1}\cdot\text{ClO}_4$  (Fig. S9)
10. UV-vis spectra of ligand  $\text{L}^{\text{ph}}$ ,  $\mathbf{1}\cdot\text{ClO}_4$  and  $\mathbf{5}\cdot\text{ClO}_4$  (Fig. S10)

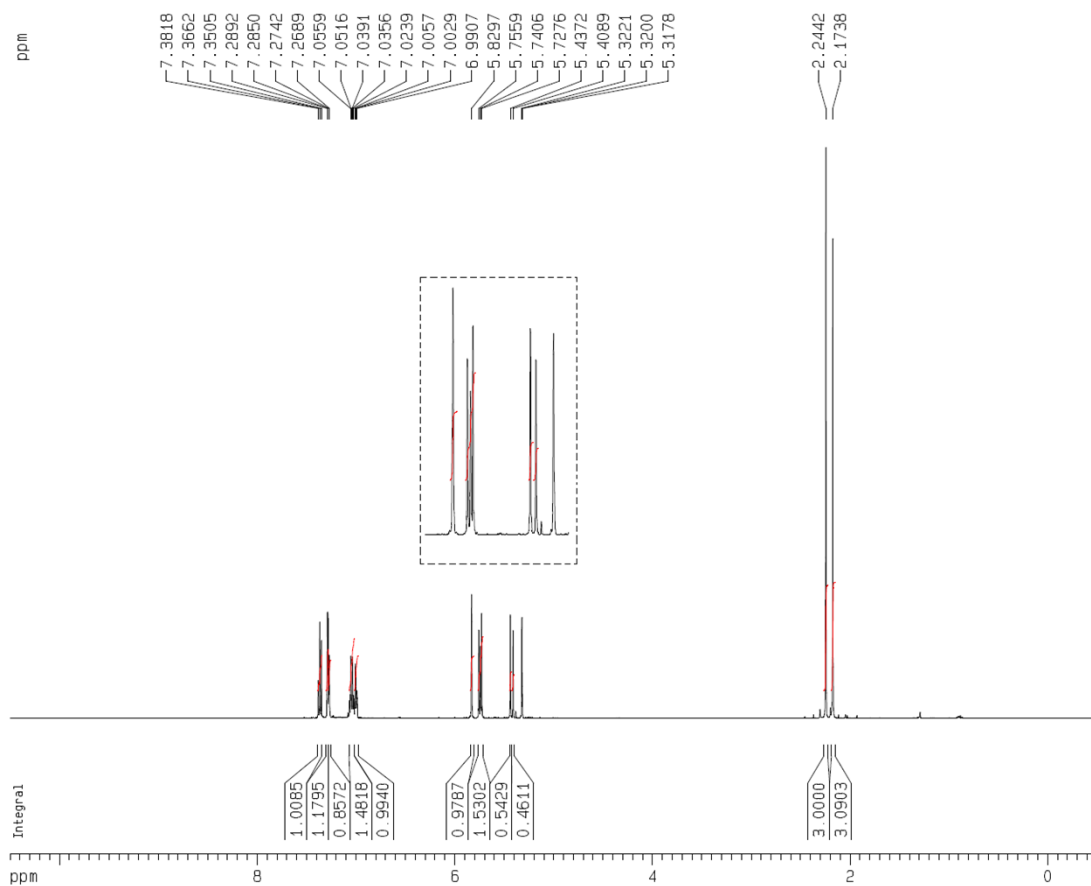

**Fig. S1.**  $^1\text{H}$  NMR spectrum of  $\text{L}^{\text{ph}}$

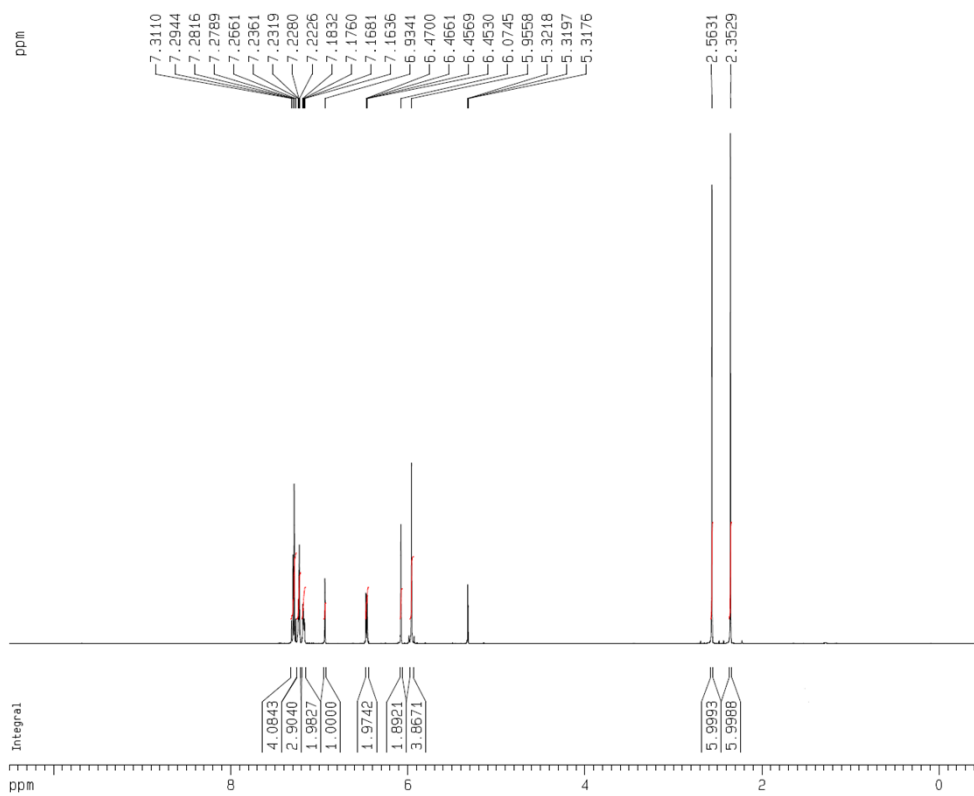

**Fig. S2.**  $^1\text{H}$  NMR spectrum of  $1 \cdot \text{ClO}_4$ .

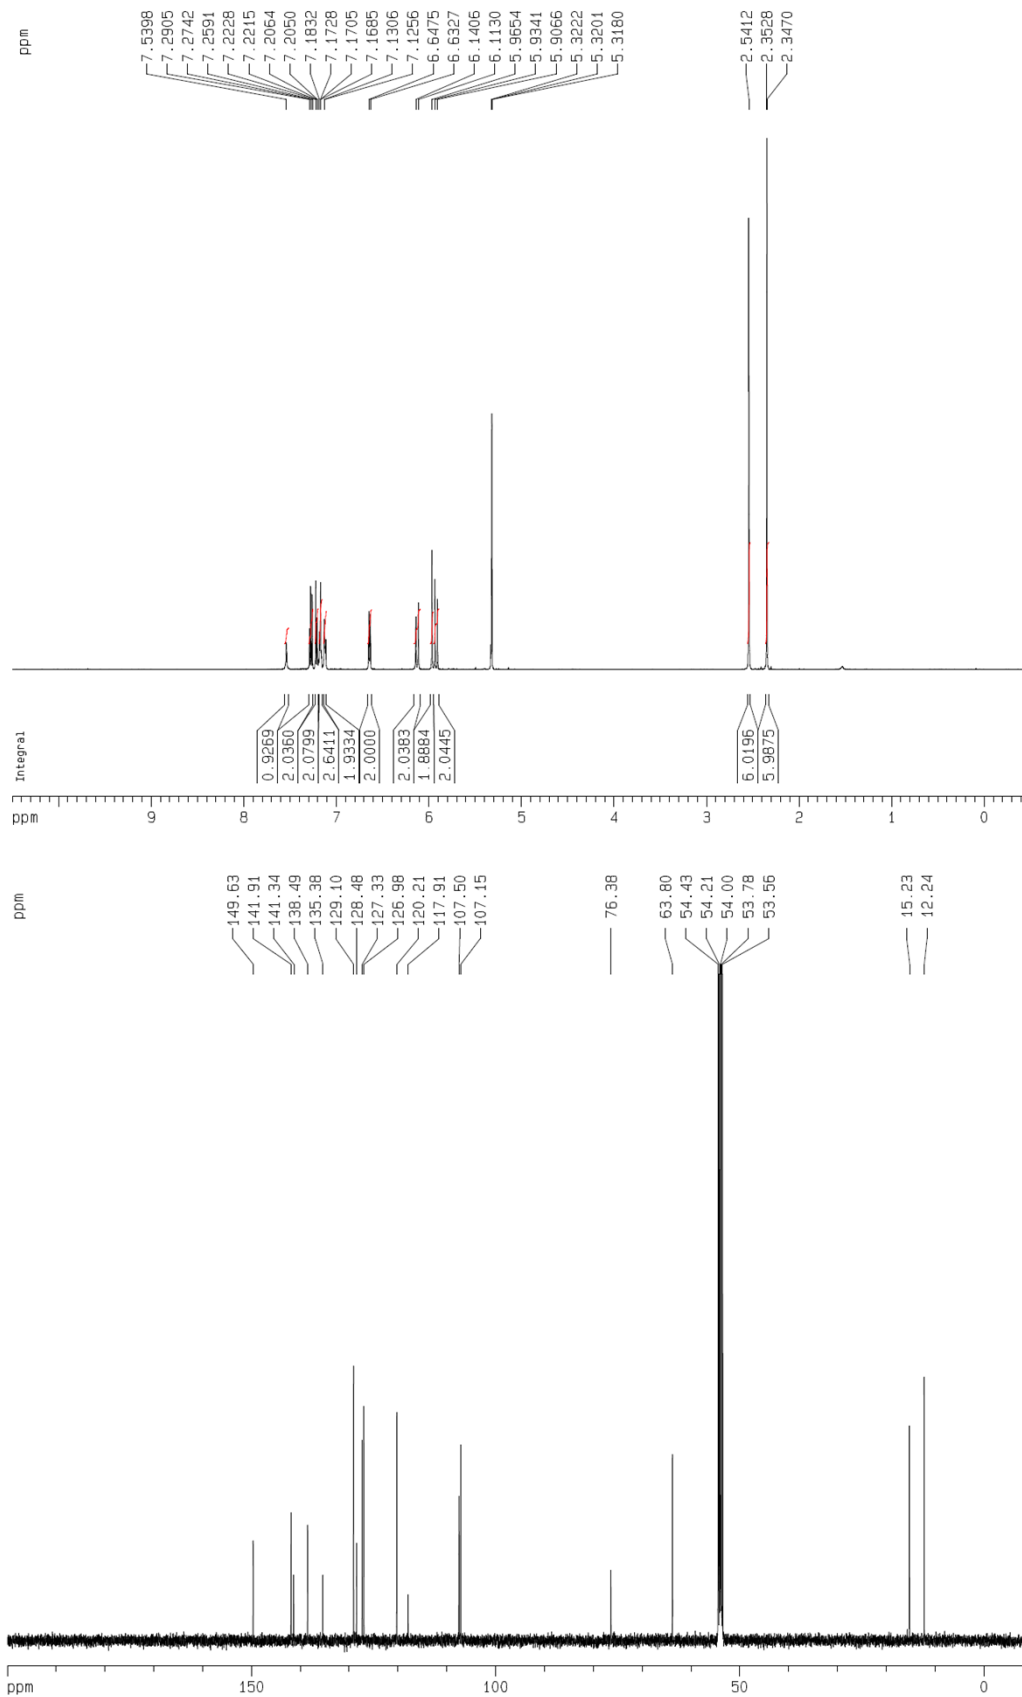

Fig. S3  $^1\text{H}$  &  $^{13}\text{C}$  NMR spectra of 3.

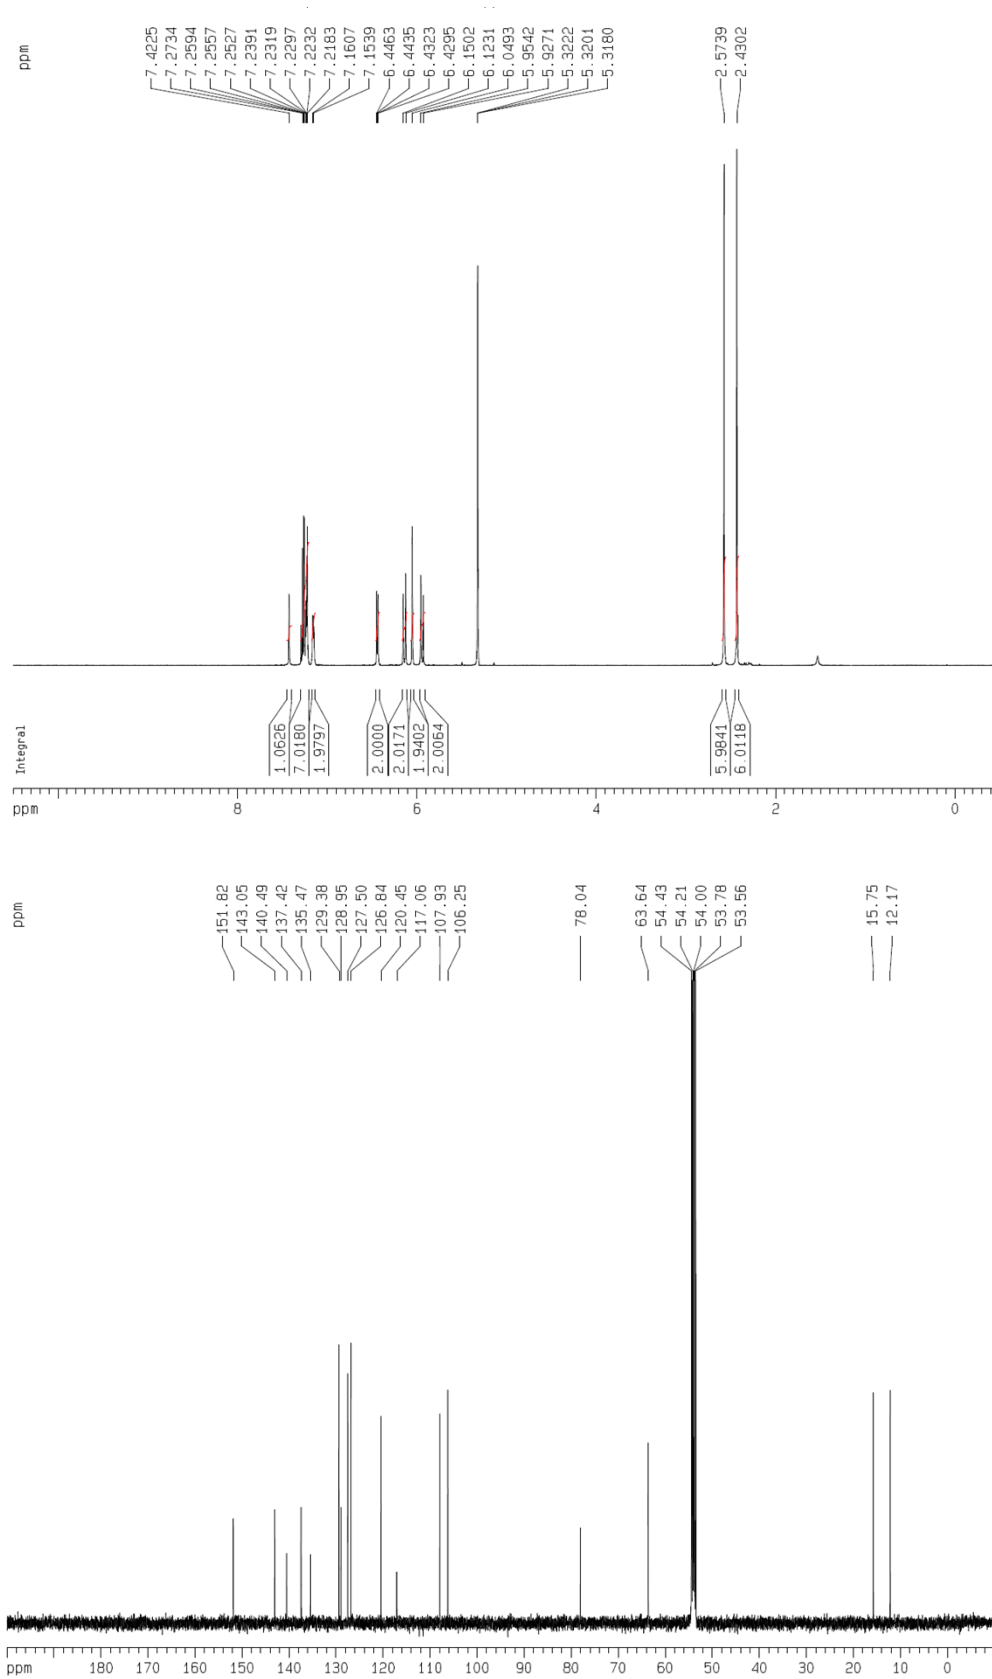

Fig. S4  $^1\text{H}$  &  $^{13}\text{C}$  NMR spectra of  $4 \cdot \text{CuCl}_2$ .

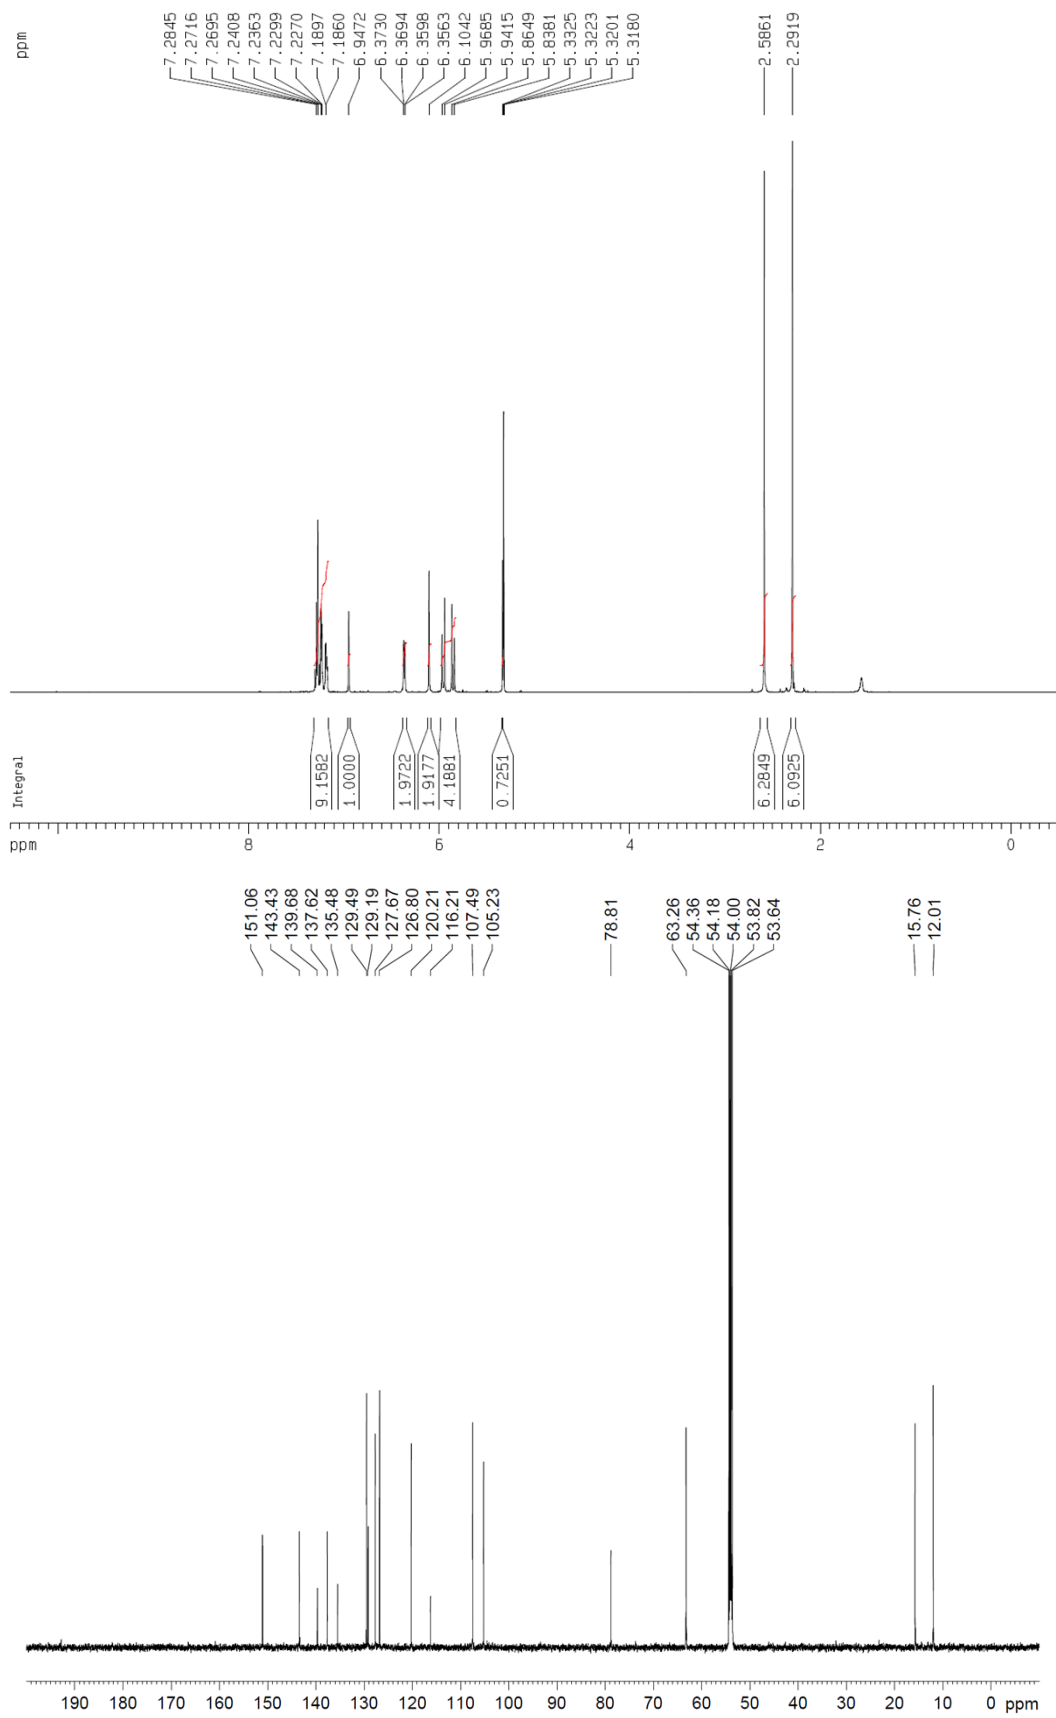

Fig. S5  $^1\text{H}$  &  $^{13}\text{C}$  NMR spectra of  $5 \cdot \text{ClO}_4$ .

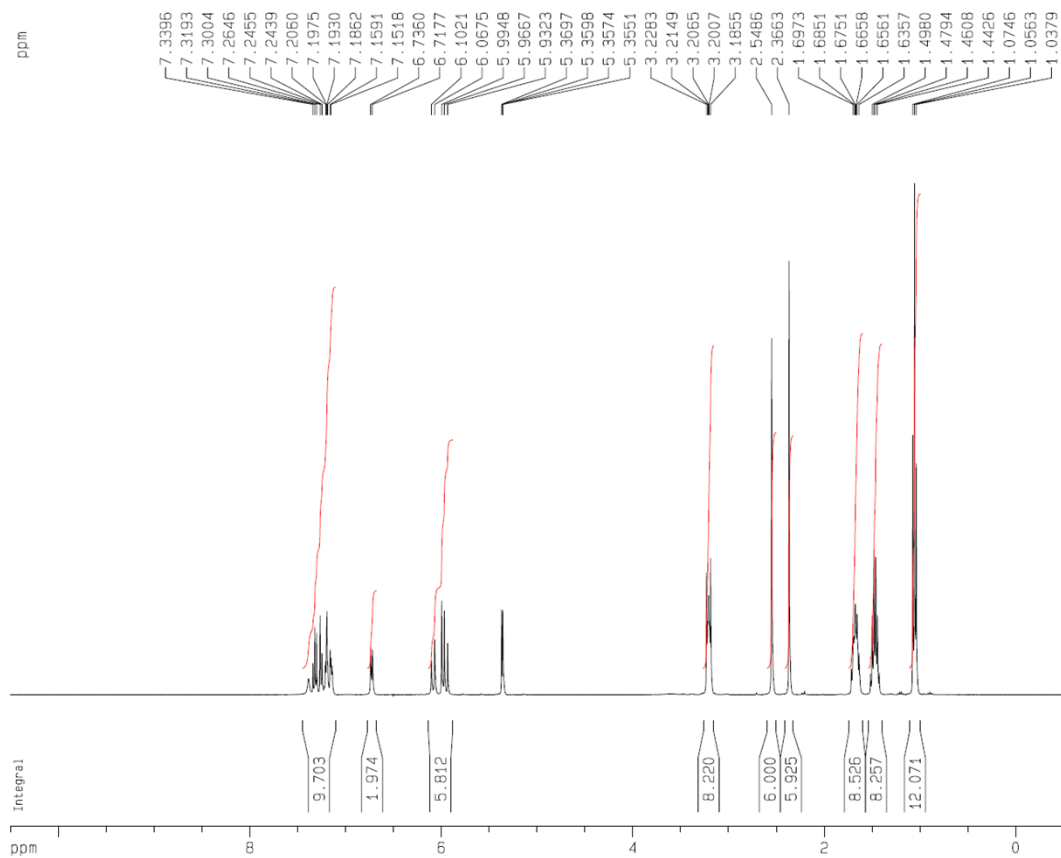

**Fig. S6**  $^1\text{H}$  NMR spectra of the reaction of **1**· $\text{ClO}_4$  with  $n\text{-Bu}_4\text{NBr}$

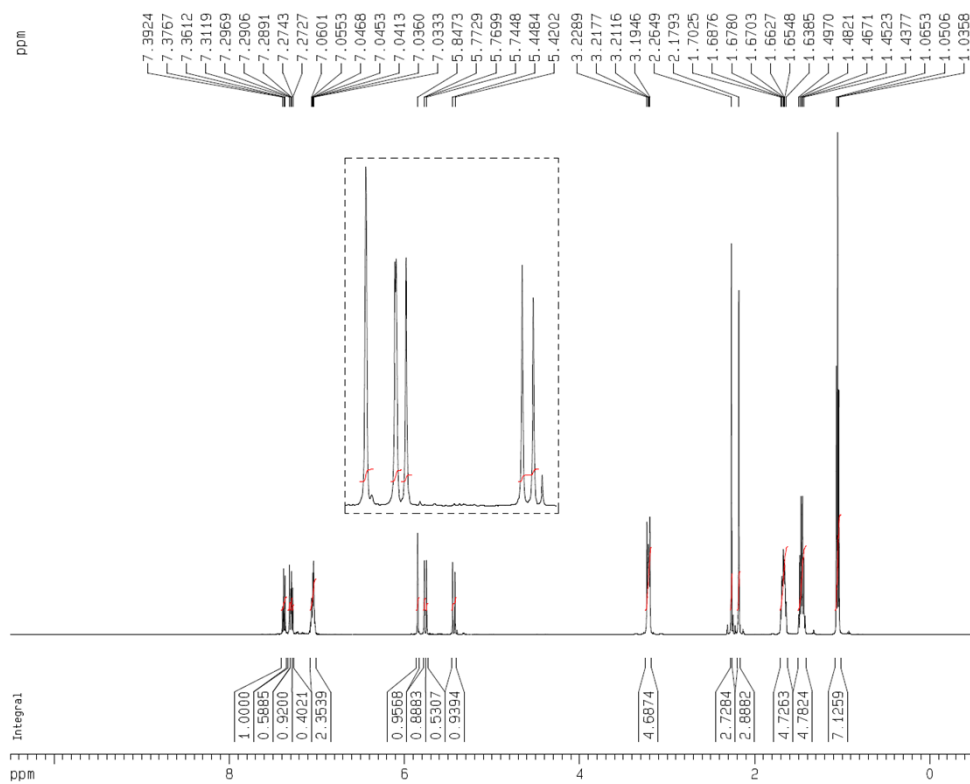

**Fig. S7**  $^1\text{H}$  NMR spectra of the reaction of **3** with  $n\text{-Bu}_4\text{NF}$

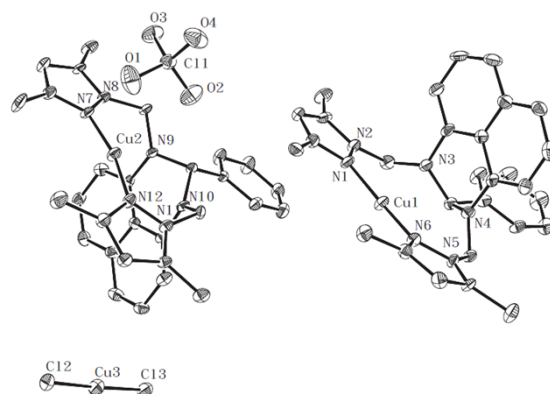

**Fig. S8** ORTEP view of the cocrystals  $\{1 \cdot \text{ClO}_4 + 4 \cdot \text{CuCl}_2\}$

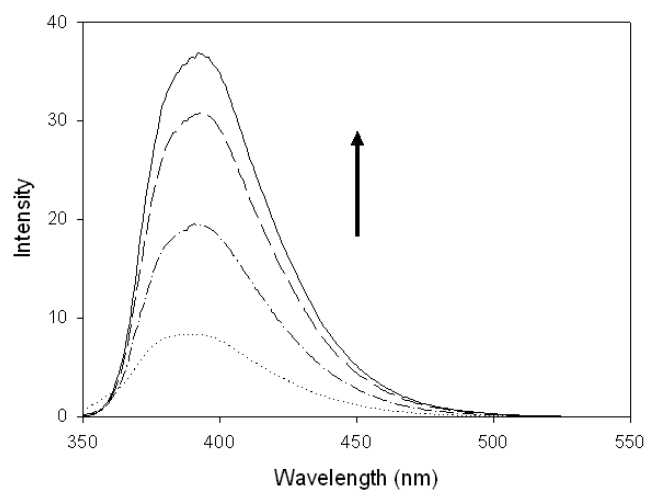

**Fig. S9** The spectral change of fluorescence spectra upon an addition of  $n\text{-Bu}_4\text{NBr}$  to complexes  $1 \cdot \text{ClO}_4$  with a molar ratio of 1:0.2 (dotted line); 1:0.5 (dash-dot line); 1:0.8 (long dash line) and 1:1 (solid line) in  $\text{CH}_2\text{Cl}_2$  excited at 340 nm at room temperature.

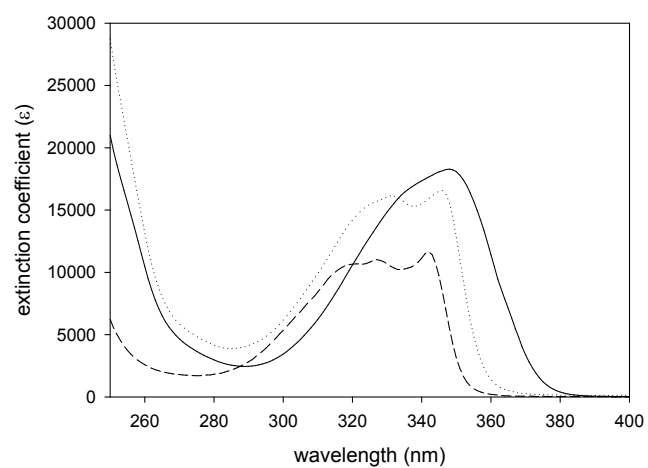

**Fig. S10** UV-vis spectra of ligand L<sup>ph</sup> (solid line), complexes 1·ClO<sub>4</sub> (dotted line) and 5·ClO<sub>4</sub> (medium dash line).
